1 Title: Predicting 30-day Hospital Readmissions Using Artificial Neural Networks with Medical  
2 Code Embedding

3  
4 Short Title: Artificial Neural Networks for Predicting 30-day Readmission.

5  
6 Authors: Wenshuo Liu, PhD<sup>1</sup>; Karandeep Singh, MD, MMSc<sup>1,2,3</sup>; Andrew M. Ryan, PhD<sup>4</sup>; Devraj  
7 Sukul, MD<sup>5</sup>; Elham Mahmoudi, PhD<sup>1,6</sup>; Akbar K. Waljee, MD, MSc<sup>1,7,8</sup>; Cooper M. Stansbury,  
8 MSc<sup>9, 10</sup> Ji Zhu, PhD, MSc<sup>1,11</sup>; Brahmajee K. Nallamothe, MD, MPH<sup>1,5,8</sup>

- 9  
10 1. Michigan Integrated Center for Health Analytics and Medical Prediction, University of  
11 Michigan, Ann Arbor, MI  
12 2. Division of Learning and Knowledge Systems, Department of Learning Health Sciences,  
13 University of Michigan Medical School, Ann Arbor, MI  
14 3. Division of Nephrology, Department of Internal Medicine, University of Michigan Medical  
15 School, Ann Arbor, MI  
16 4. Department of Health Management and Policy, University of Michigan School of Public  
17 Health, Ann Arbor, MI  
18 5. Division of Cardiology, Department of Internal Medicine, University of Michigan Medical  
19 School, Ann Arbor, MI  
20 6. Department of Family Medicine, University of Michigan Medical School, Ann Arbor, MI  
21 7. Division of Gastroenterology and Hepatology, Department of Internal Medicine,  
22 University of Michigan Medical School, Ann Arbor, MI  
23 8. VA Center for Clinical Management Research, VA Ann Arbor Health Care System, Ann  
24 Arbor, MI  
25 9. Department of Computational Biology and Bioinformatics, University of Michigan  
26 Medical School, Ann Arbor, MI  
27 10. Department of Systems, Populations, and Leadership, University of Michigan School of  
28 Nursing, Ann Arbor, MI  
29 11. Department of Statistics, University of Michigan, Ann Arbor, MI

30  
31 Correspondence: Brahmajee K. Nallamothe, MD, MPH  
32 University of Michigan School of Medicine  
33 2800 Plymouth Road, Building 16  
34 Ann Arbor, MI 48109; Tel: 734.615.3878  
35 [bnallamo@med.umich.edu](mailto:bnallamo@med.umich.edu)  
36

37 Date of Original Submission: June 3 2019

38  
39 Word Count: 3217 (Excluding References)  
40 225 Abstract

41  
42 Grant Support: Michigan Institute for Data Science (MIDAS) Challenge Award

43  
44 Keywords: Hospital readmission; ICD-9 codes; word embedding; risk-adjustment;  
45 prediction modeling; machine learning; artificial neural networks

46  
47 Competing Interests: No potential conflicts of interest relevant to this manuscript are present.

48  
49 Writing Assistance: No writing assistance was provided.  
50

51 Author Contributions:

52

53 Wenshuo Liu: Study design, methodology development, data curation and statistical analysis,  
54 drafting of manuscript, critical review of manuscript.

55

56 Karandeep Singh: critical review of manuscript.

57

58 Andrew M. Ryan: critical review of manuscript.

59

60 Devraj Sukul: data curation, critical review of manuscript.

61

62 Elham Mahmoudi: critical review of manuscript.

63

64 Akbar K. Waljee: critical review of manuscript.

65

66 Cooper M. Stansbury: critical review of manuscript.

67

68 Ji Zhu: Study design, methodology development, statistical analysis, drafting of manuscript,  
69 critical review of manuscript.

70

71 Brahmajee K. Nallamothe: Study design, data interpretation, drafting of manuscript, critical  
72 review of manuscript.

73

74

75

76 Transparency declaration:

77

78 Wenshuo Liu, Ji Zhu, and Brahmajee Nallamothe affirm that this manuscript is an honest,

79 accurate, and transparent account of the study being reported; that no important aspects of the

80 study have been omitted; and that any discrepancies from the study as planned have been

81 explained.

82

83

84 **ABSTRACT (PLOS ONE Word Count 225)**

85 Reducing unplanned readmissions is a major focus of current hospital quality efforts. In order to  
86 avoid unfair penalization, administrators and policymakers use prediction models to adjust for  
87 the performance of hospitals from healthcare claims data. Regression-based models are a  
88 commonly utilized method for such risk-standardization across hospitals; however, these  
89 models often suffer in accuracy. In this study we, compare four prediction models for unplanned  
90 patient readmission for patients hospitalized with acute myocardial infarction (AMI), congestive  
91 health failure (HF), and pneumonia (PNA) within the Nationwide Readmissions Database in  
92 2014. We evaluated hierarchical logistic regression and compared its performance with gradient  
93 boosting and two models that utilize artificial neural network. We show that unsupervised Global  
94 Vector for Word Representations embedding representations of administrative claims data  
95 combined with artificial neural network classification models significantly improves prediction of  
96 30-day readmission. Our best models increased the AUC for prediction of 30-day readmissions  
97 from 0.68 to 0.72 for AMI, 0.60 to 0.64 for HF, and 0.63 to 0.68 for PNA compared to  
98 hierarchical logistic regression. Furthermore, risk-standardized hospital readmission rates  
99 calculated from our artificial neural network model that employed embeddings led to  
100 reclassification of approximately 10% of hospitals across categories of hospital performance.  
101 This finding suggests that prediction models that incorporate new methods classify hospitals  
102 differently than traditional regression-based approaches and that their role in assessing hospital  
103 performance warrants further investigation.

104

105

106

107

108 **INTRODUCTION**

109

110 Approximately 15% of patients discharged after an acute hospitalization are readmitted within  
111 30 days, leading to potentially worse clinical outcomes and billions of dollars in healthcare costs  
112 [1]. Given these concerns, multiple quality efforts have been instituted in recent years to reduce  
113 readmissions in the United States. For example, the Medicare Hospital Readmission Reduction  
114 Program (HRRP) was created as part of the Patient Protection and Affordable Care Act and  
115 financially penalizes U.S. hospitals with excess 30-day readmission rates among Medicare  
116 beneficiaries [2,3]. Similar programs are being launched for patients with commercial insurance  
117 with the goal of further incentivizing hospitals to reduce readmissions [4,5].

118

119 Not surprisingly, the development of these programs has led to an increased demand for  
120 statistical models that accurately predict readmissions using available healthcare claims data.  
121 As the likelihood of readmission is related to key input features of patients (e.g., age and co-  
122 morbidities), differences in the distribution of patients across hospitals based on such features  
123 may lead to unfair penalization of hospitals that care for more at-risk individuals. Therefore,  
124 using prediction statistical models to adjust for patient risk across hospitals is a major priority for  
125 accountability programs [6]. However, the performance of prediction models for readmissions  
126 have been generally poor. For example, existing methods that rely on regression-based models  
127 report area under the curve (AUC) for the receiver operating characteristic in the range of 0.63  
128 to 0.65, suggesting limited discrimination for prediction [7,8]. Recent use of more flexible  
129 prediction models that leverage machine learning algorithms, such as random forest and  
130 traditional artificial neural network (ANN) models, have attempted to address this limitation with  
131 minimal improvements [9-11].

132

133 The purpose of this study was to explore whether advances in ANN models could improve  
134 prediction of 30-day readmission using administrative claims data and how this potential  
135 improvement may impact calculation of risk-standardized hospital readmission rates. ANN  
136 models abstract input features from large-scale datasets to predict output probability by  
137 approximating a combination of non-linear functions over the input feature-space [12, 13].  
138 Modern deployment of ANN models, including deep learning models, have been used  
139 successfully in a range of applications that include image classification and natural language  
140 processing [14-17], as well as prediction from electronic health records [18,19]. We apply this  
141 approach to a large United States administrative claims data source focusing on 3 common  
142 conditions that were targeted under the HRRP: acute myocardial infarction (AMI), heart failure  
143 (HF) and pneumonia (PNA).

144

## 145 **METHODS**

146

147 We conducted this study following the Transparent Reporting of a Multivariable Prediction  
148 Model for Individual Prognosis or Diagnosis (TRIPOD) reporting guidelines (see checklist in the  
149 Supplementary Information). All statistical code for replicating these analyses are available on  
150 the following GitHub repository: <https://github.com/wenshuoliu/DLproj/tree/master/NRD>. Data  
151 used for these analyses are publicly available at: [https://www.hcup-](https://www.hcup-us.ahrq.gov/tech_assist/centdist.jsp)  
152 [us.ahrq.gov/tech\\_assist/centdist.jsp](https://www.hcup-us.ahrq.gov/tech_assist/centdist.jsp).

153

### 154 Study Cohort

155 We used the 2014 Nationwide Readmissions Database (NRD) developed by the Agency for  
156 Healthcare Research and Quality (AHRQ) Healthcare Cost and Utilization Project (HCUP),  
157 which includes data on nearly 15 million admissions from 2048 hospitals [20-22]. The NRD has  
158 the advantage of including all payers, including government and commercial insurers. We

159 identified patients hospitalized for AMI, HF, and PNA. We created a separate cohort for each  
160 condition using strategies for identifying patients that were adopted from prior published work [8,  
161 23]. The cohort of index admissions for each condition was based on principal *International*  
162 *Classification of Diseases-9* (ICD-9) diagnosis codes at discharge (e.g. in the case of AMI we  
163 used 410.xx, except for 410.x2) while excluding the following cases: (1) records with zero length  
164 of stay for AMI patients (n=4,926) per standards for constructing that cohort (as patients with  
165 AMI are unlikely to be discharged the same day); (2) patients who died in the hospital (n=13,896  
166 for AMI, n=14,014 for HF, n=18,648 for PNA); (3) patients who left the hospital against medical  
167 advice (n=2,667 for AMI, 5,753 for HF, n=5,057 for PNA); (4) patients with hospitalizations and  
168 no 30-day follow up (i.e. discharged in December, 2014 (n=23,998 for AMI, n=44,264 for HF,  
169 n=47,523 for PNA)); (5) patients transferred to another acute care hospital (n=8,400 for AMI,  
170 n=5,393 for HF, n=4,839 for PNA); (6) patients of age < 18 years old at the time of admission  
171 (n=12 for AMI, n=409 for HF, n=28,159 for PNA); and (8) patients discharged from hospitals  
172 with less than 10 admissions (n=1,956 for AMI, n=1,221 for HF, n=418 for PNA). In  
173 circumstances where the same patient was admitted several times during the study period, we  
174 selected only the first admission. Flow diagrams for the cohort selection are shown in eFigure 1.

### 175 176 Study Variables

177 Our outcome was 30-day unplanned readmission created using the NRD Planned Readmission  
178 Algorithm [23]. The NRD also includes patient-level information on demographics and up to 30  
179 ICD-9 diagnosis codes and 15 procedure codes from each hospitalization. Among the diagnosis  
180 codes, the principal diagnosis code at discharge represents the primary reason for the  
181 hospitalization while the rest represent comorbidities for the patient. To improve computational  
182 efficiency, we only included codes that appeared at least 10 times in the whole NRD database,  
183 reducing the number of ICD-9 diagnosis and ICD-9 procedure codes for inclusion in our

184 analyses from 12,233 to 9,778 diagnosis codes and from 3,722 to 3,183 procedure codes,  
185 respectively.

186

### 187 Statistical Models and Analysis

188 We evaluated four statistical models: 1) a hierarchical logistic regression model; 2) gradient  
189 boosting (using the eXtreme Gradient Boosting [XGBoost] [24] approach, a widely-used,  
190 decision tree-based machine learning algorithm) using ICD-9 diagnosis and procedure codes  
191 represented as dummy variables (1 if present, 0 if absent); 3) an ANN model using a feed-  
192 forward neural network with ICD-9 codes represented as dummy variables; and 4) an ANN  
193 model in which ICD-9 codes were represented as latent variables learned through a word  
194 embedding algorithm. We used hierarchical logistic regression as a baseline comparator given  
195 its ubiquitous use in health services and outcomes research. XGBoost is based on gradient  
196 boosted decision trees and it is designed for speed and performance. We used it given its rising  
197 popularity in recent years as a flexible machine learning algorithm for structured data. A more  
198 detailed explanation for the statistical models and ANN approaches as well as accompanying  
199 statistical code are available in the Supplementary Information.

200

201 The first model we constructed employed a hierarchical logistic regression model taking into  
202 account age, gender and co-morbidities. For co-morbidities, we used the well-established  
203 Elixhauser Comorbidity Index [25] to identify 29 variables to include as independent features in  
204 the model, with a hospital-specific intercept to account for patient clustering [7]. We  
205 implemented this model using the R package *lme4*.

206

207 For the second model, we applied XGBoost with the ICD-9 codes represented as dummy “1/0”  
208 input variables to provide a comparison from a popular machine learning tool. XGBoost has  
209 been well-recognized as an “off-the-shelf” algorithm that is highly efficient and requires little

210 hyper-parameter tuning to achieve state-of-the-art performance in a variety of tasks [26]. We  
211 implemented this model using the *Python* package *xgboost*.

212

213 For the third model, we implemented a feed-forward ANN model trained on dummy variable  
214 representation of ICD-9 diagnoses and procedure codes. The hospital ID was treated in the  
215 same way. We employed two hidden layers of neurons in this network to learn complex patterns  
216 from the input features instead of using human-engineered selection of variables (i.e., the  
217 Elixhauser Comorbidity Index). However, ANN models can be difficult to train because they  
218 require human parameter specification to reach optimal performance. Further, ANN models may  
219 be difficult to train due on large data-sets (over 4 million parameters in this case).

220

221 In the fourth model, we encoded 9,778 ICD-9 diagnosis and 3,183 procedure codes into 200-  
222 and 50-dimensional latent variable space, using the Global Vector for Word Representations  
223 (GloVe) algorithm [27]. We used GloVe, an unsupervised embedding algorithm to project ICD-9  
224 co-occurrences to a lower dimension feature-space. The presence of two ICD-9 diagnosis or  
225 procedure codes in a patient record during hospitalization was considered as a co-occurrence.  
226 We then counted the number of co-occurrences for each pair of ICD-9 diagnosis and/or  
227 procedure codes through the entire NRD database (excluding the testing set) and constructed  
228 the code embedding vectors according to the GloVe algorithm. A two-dimensional visualization  
229 of the embedding vectors of the ICD-9 diagnosis codes is shown in the eFigure 3. The  
230 visualization demonstrates that word embedding resulted in related diseases being closer to  
231 each other and is consistent with the application of word embedding algorithms in other  
232 administrative claims data [28, 29].

233

234 We used the deep set structure proposed by Zaheer et al [30] to incorporate ICD-9 diagnosis  
235 and procedure codes into the ANN model. This allowed us to account for varying counts of



236 secondary ICD-9 diagnosis and procedure codes across patients and allow our model to be  
237 invariant to the ordering of these codes (e.g., the 2<sup>nd</sup> and the 10<sup>th</sup> code are interchangeable).  
238 The hospital ID was embedded into a 1-dimensional variable – conceptually this is similar to the  
239 hospital-level random intercept used in the hierarchical logistic regression models. The  
240 architectures of the two ANN models are shown in eFigure 2. The implementation of the ANN  
241 models was done using the *Python* packages *Keras* and *Tensorflow*.

242  
243 To avoid the risk of overfitting, each of the study cohorts were divided into training, validation  
244 (for parameter tuning), and final testing sets at a proportion of 80%, 10%, and 10%, stratified by  
245 hospitals (i.e., within each hospital). We calculated AUC for the standard hierarchical logistic  
246 regression model, the XGBoost model and both ANN models on the final testing set, with the  
247 95% confidence interval given from a 10-fold cross-validation. Once the models were  
248 developed, we then calculated risk-standardized hospital readmission rates for both the  
249 hierarchical logistic regression and ANN models (as the ANN models were superior to the  
250 gradient boosting model). We calculated these using predictive margin, which is a  
251 generalization of risk adjustment that can be applied for both linear and non-linear models (like  
252 ANN models) [31, 32]. Specifically, the predictive margin for a hospital is defined as the average  
253 predicted readmission rate if everyone in the cohort had been admitted to that hospital. Benefits  
254 of predictive margins over conditional approaches have been discussed in Chang et al [33]. We  
255 compared this approach to the traditional approach for calculating risk-standardized hospital  
256 readmission rates in hierarchical logistic regression models that uses the predicted over  
257 expected readmission ratio for each hospital and then multiplying by the overall unadjusted  
258 readmission rate [7]; importantly, we found similar results (see eFigure 4).

259

## 260 **RESULTS**

### 261 Study Cohort

262 Our study cohort included 202,038 admissions for AMI, 303,233 admissions for HF, and  
263 327,833 admissions for PNA, with unadjusted 30-day readmission rates of 12.0%, 17.7% and  
264 14.3% respectively. The mean (standard deviation) age was 66.8 (13.7) for AMI, 72.5 (14.2) for  
265 HF and 69.2 (16.8) for PNA, with the proportion of females 37.6%, 48.9% and 51.8%,  
266 respectively. Summary baseline characteristics are shown in Table 1 with additional details of  
267 the ICD-9 diagnosis and procedure codes in eTable 1. In these cohorts, we noticed an  
268 extremely skewed prevalence of ICD-9 diagnosis and procedure codes that were used to  
269 identify features for training related to comorbidities. For example, in the AMI cohort, three  
270 quarters of the 5,614 distinct secondary ICD-9 diagnosis codes appear less than 49 times  
271 (prevalence 0.02%), while the most frequent ICD-9 diagnosis code (i.e., 41.401 for coronary  
272 atherosclerosis of native coronary artery) appears 152,602 times (prevalence 75.5%). See  
273 eTable 1 for details.

274

#### 275 Performance of Prediction Models

276 Results of prediction of 30-day readmission as assessed by AUC are reported in Table 2 for  
277 each model and each cohort. The gradient boosting model utilizing XGBoost performed slightly  
278 better than the hierarchical logistic regression model and similar to the basic feed-forward ANN  
279 model. In general, the medical code embedding deep set architecture model generated the best  
280 results on all cohorts relative to the other three models. Compared with hierarchical logistic  
281 regression, the medical code embedding deep set architecture model improved the AUC from  
282 0.68 (95% CI 0.678, 0.683) to 0.72 (95% CI 0.718, 0.722) for the AMI cohort, from 0.60 (95% CI  
283 0.592, 0.597) to 0.64 (95% CI 0.635, 0.639) for the HF cohort, from 0.63 (95% CI 0.624, 0.632)  
284 to 0.68 (95% CI 0.678, 0.683) for the PNA cohort. In a sensitivity analysis, we repeated the  
285 same analysis on elderly patients (65 years old and above) and these are provided in eTable 2.  
286 Not unexpectedly, the overall AUCs decreased in the sensitivity analysis due to restriction of the  
287 cohort by age (which is a powerful predictor of readmission for patients); however, the margins

288 for differences in AUCs across the four different statistical models increased slightly with this  
289 restriction by age.

290

### 291 Risk-Standardized Hospital Readmission Rates

292 Given its overall higher performance, we compared risk-standardized hospital readmission rates  
293 calculated from the medical code embedding deep set architecture model with those calculated  
294 from the hierarchical logistic regression model. The histograms and summaries of these results  
295 are shown in Figure 1. Distributions of the risk-standardized hospital readmission rates from the  
296 two models were similar with just a modest shift downward in the mean for the medical code  
297 embedding deep set architecture model. We observed substantial differences in terms of  
298 rankings of individual hospitals between the two models. For both models, we divided the  
299 hospitals into three groups based on quintiles of predicted risk-standardized hospital  
300 readmission rates: top 20%, middle 60% and bottom 20%. For AMI, the medical code  
301 embedding deep set architecture model classified 72 (6.4%) hospitals in the middle 60% that  
302 the hierarchical model classified in the top 20% and classified 37 (3.3%) hospitals in the middle  
303 60% that the hierarchical model classified in the bottom 20%. Results were similar for the HF  
304 and PNA cohorts (Table 3).

305

306

## 307 **DISCUSSION**

308

309 In recent years, ANN models have shown advantages over traditional statistical models in a  
310 variety of medical tasks [18, 19]. Whether the application of such models to administrative  
311 claims data brings similar improvement in specific tasks related to prediction is worth exploring.  
312 This is especially important given the ubiquitous nature of claims data for assessing quality and  
313 hospital performance. In this paper, we applied ANN models towards the task of predicting 30-  
314 day readmission after AMI, HF, and PNA hospitalizations and compared it to existing

315 approaches that use input features from classification systems that rely on expert knowledge  
316 like hierarchical logistic regression models as well as gradient boosting. Our findings suggest  
317 ANN models provide more accurate predictions of readmission and generate risk-standardized  
318 hospital readmission rates that vary from commonly used hierarchical logistic regression  
319 models.

320

321 There has been substantial work performed on constructing risk prediction models to predict  
322 readmissions after a hospitalization. The most frequent way these models are employed is  
323 through regression-based models that include age, gender and co-morbidities as input features  
324 [7]. For co-morbidities, ICD-9 diagnosis and procedure codes obtained from administrative  
325 claims data are used as input features to adjust for differences in individual patient risk in these  
326 models; however, not all of the thousands of potential ICD-9 diagnosis and procedure codes are  
327 included in the models and selecting which to incorporate is an important step. The selection  
328 has been based largely on expert input and empirical studies that have been used to generate  
329 fixed classification systems like the Hierarchical Condition Categories [34] or Elixhauser  
330 Comorbidity Index [25].

331

332 An advantage of ANN models is their ability as a statistical model to include thousands of  
333 features, as well as capture potential non-linear effects and interactions of these features. ANN  
334 models do not rely on human-generated classification systems but learn to automate extraction  
335 of relevant features from the data. Yet few studies to date have employed these models in  
336 administrative claims data. We believe a primary reason for this is that ANN models can be  
337 difficult to train due to the issues related to parameter optimization and memory consumption in  
338 the setting of a large number of parameters – sometimes in the order of millions. In the few  
339 studies that have used ANN models with administrative claims data [9, 35, 36], their use also  
340 may not have fully captured their full potential for risk prediction. For example, the use of binary

341 “1/0” input features for ICD-9 diagnosis and procedure codes may ignore hidden relationships  
342 across comorbidities, limiting the ability of ANN models to improve on traditional hierarchical  
343 logistic regression or other methods like gradient boosting.  
344  
345 Of course, there has been some work on predicting readmissions using ANN models in the  
346 published literature. Futoma et al. implemented the basic architecture of feed-forward ANN  
347 models and showed modest advantages over conventional methods [9]. A number of  
348 researchers proposed to embed medical concepts (including but not limited to ICD-9 diagnosis  
349 and procedural codes) into a latent variable space to capture their co-relationships [28, 29, 37];  
350 however, these investigators used this approach largely for cohort creation rather than  
351 predicting clinical outcomes or risk-adjustment. Krompass et al [36] used Hellinger-distance  
352 based principal components analysis [38] to embed ICD-10 codes and then built a logistic  
353 regression model using the embedded codes as input features. They found marginal  
354 improvements in prediction of readmissions over a feed-forward neural network but were  
355 restricted by their limited sample size. Choi et al. [35] designed a graph-based attention model  
356 to supplement embedding with medical ontologies for various prediction tasks, including  
357 readmission. However, their model did not explicitly consider the fact that the medical codes are  
358 permutation invariant. In this paper, we took advantage of a novel word embedding approach,  
359 Global Vector for Word Representations (GloVe) [27], as well as a new and recently proposed  
360 deep set architecture [30] to fully capture the inter-relationship and the permutation-invariant  
361 nature of the diagnosis and procedure codes. These choices – which were purposeful and  
362 driven by our intuition on the benefits of ANN models for this specific task – resulted in improved  
363 accuracy of prediction for readmission for a word embedding deep set architecture model  
364 across all 3 conditions.  
365

366 Our study should be interpreted in context of the following limitations. First, although we found  
367 ANN models outperformed hierarchical logistic regression models, it is uncertain whether these  
368 improvements will justify their use more broadly as this requires consideration of other issues.  
369 For example, ANN models require large-scale data sources to train. Even though such data  
370 were available given the NRD for our current work, these are not always available. But the  
371 widespread availability and application of administrative claims data in assessing quality and  
372 hospital performance justifies the need to explore ANN models (and other approaches) further.  
373 Second, ANN models are computationally intensive and retain a “blackbox” feel with its findings  
374 difficult to understand and explain to users (similar to other models like gradient boosting).  
375 These issues may make it less attractive to policymakers and administrators when there may be  
376 a need to justify why performance is lacking in a public program (e.g., HRRP). Third, ANN  
377 models may not work for applications beyond 30-day readmission in these 3 common  
378 conditions. Work is needed to compare the performance of ANN models with traditional  
379 approaches for other outcomes (e.g., mortality), rare diseases, or populations (i.e., non-  
380 hospitalized patients).

381  
382 In summary, ANN models with medical code embeddings have higher predictive accuracy for  
383 30-day readmission when compared with hierarchical logistic regression models and gradient  
384 boosting, a widely used, decision tree-based machine learning algorithm. Furthermore, ANN  
385 models generate risk-standardized hospital readmission rates that lead to differing assessments  
386 of hospital performance when compared to these other approaches. The role of ANN models in  
387 clinical and health services research warrants further investigation.

388  
389

390 **ACKNOWLEDGEMENTS**

391 Funding and Support

392 Michigan Institute for Data Science Challenge Award (MIDAS), University of Michigan.

393

394 Role of Funder/Sponsor Statement

395 The design and conduct of the study; collection, management, analysis, and interpretation of the  
396 data; preparation, review, or approval of the manuscript; and decision to submit the manuscript  
397 for publication was at the discretion of the investigators and was not directed or influenced by  
398 funding support.

399

400 Author Contributions

401 Wenshuo Liu: Study design, methodology development, data curation and statistical analysis,  
402 drafting of manuscript, critical review of manuscript.

403

404 Karandeep Singh: critical review of manuscript.

405

406 Andrew M. Ryan: critical review of manuscript.

407

408 Devraj Sukul: data curation, critical review of manuscript.

409

410 Elham Mahmoudi: critical review of manuscript.

411

412 Akbar K. Waljee: critical review of manuscript.

413

414 Cooper M. Stansbury: critical review of manuscript.

415

416 Ji Zhu: Study design, methodology development, statistical analysis, drafting of manuscript,  
417 critical review of manuscript.

418

419 Brahmajee K. Nallamothe: Study design, data interpretation, drafting of manuscript, critical  
420 review of manuscript.

421

422

423 Author Access to Data and Data Analysis

424 Wenshuo Liu and all study co-authors had full access to all the data in the study and takes  
425 responsibility for the integrity of the data and the accuracy of the data analysis

426

427

428 Author Disclosures

429 The authors report no relevant conflicts of interests related to the work presented.

430

431

432 Transparency Declaration

433

434 Wenshuo Liu, Ji Zhu, and Brahmajee Nallamothe affirm that this manuscript is an honest,  
435 accurate, and transparent account of the study being reported; that no important aspects of the  
436 study have been omitted; and that any discrepancies from the study as planned have been  
437 explained.

438

440 **REFERENCES**

- 441
- 442 1. Jencks SF, Williams MV, Coleman EA. Rehospitalizations among Patients in the Medicare  
443 Fee-for-Service Program. *N Engl J Med*. 2009;360(14):1418-1428.  
444 doi:10.1056/NEJMsa0803563
- 445 2. Rosenbaum S. The Patient Protection and Affordable Care Act: Implications for Public  
446 Health Policy and Practice. *Public Health Rep*. 2011;126(1):130-135.
- 447 3. Patient Protection and Affordable Care Act - HealthCare.gov Glossary. HealthCare.gov.  
448 <https://www.healthcare.gov/glossary/patient-protection-and-affordable-care-act/>. Accessed  
449 January 7, 2019.
- 450 4. Chen C, Scheffler G, Chandra A. Readmission penalties and health insurance expansions:  
451 a dispatch from Massachusetts. *J Hosp Med*. 2014;9(11):681-687. doi:10.1002/jhm.2213
- 452 5. Chakraborty H, Axon RN, Brittingham J, Lyons GR, Cole L, Turley CB. Differences in  
453 Hospital Readmission Risk across All Payer Groups in South Carolina. *Health Serv Res*.  
454 2017;52(3):1040-1060. doi:10.1111/1475-6773.12579
- 455 6. Kansagara D, Englander H, Salanitro A, et al. Risk prediction models for hospital  
456 readmission: A systematic review. *JAMA*. 2011;306(15):1688-1698.  
457 doi:10.1001/jama.2011.1515
- 458 7. Krumholz HM, Lin Z, Drye EE, et al. An Administrative Claims Measure Suitable for  
459 Profiling Hospital Performance Based on 30-Day All-Cause Readmission Rates Among  
460 Patients With Acute Myocardial Infarction. *Circulation Cardiovascular Quality and*  
461 *Outcomes*. 2011;4(2):243-252. doi:10.1161/CIRCOUTCOMES.110.957498
- 462 8. Sukul D, Sinha SS, Ryan AM, Sjoding MW, Hummel SL, Nallamotheu BK. Patterns of  
463 Readmissions for Three Common Conditions Among Younger US Adults. *Am J Med*.  
464 2017;130(10):1220.e1-1220.e16. doi:10.1016/j.amjmed.2017.05.025
- 465 9. Futoma J, Morris J, Lucas J. A comparison of models for predicting early hospital  
466 readmissions. *Journal of Biomedical Informatics*. 2015;56:229-238.  
467 doi:10.1016/j.jbi.2015.05.016
- 468 10. Mortazavi Bobak J., Downing Nicholas S., Bucholz Emily M., et al. Analysis of Machine  
469 Learning Techniques for Heart Failure Readmissions. *Circulation: Cardiovascular Quality*  
470 *and Outcomes*. 2016;9(6):629-640. doi:10.1161/CIRCOUTCOMES.116.003039
- 471 11. Frizzell JD, Liang L, Schulte PJ, et al. Prediction of 30-Day All-Cause Readmissions in  
472 Patients Hospitalized for Heart Failure: Comparison of Machine Learning and Other  
473 Statistical Approaches. *JAMA Cardiol*. 2017;2(2):204-209.  
474 doi:10.1001/jamacardio.2016.3956
- 475 12. LeCun Y, Bengio Y, Hinton G. Deep learning. *Nature*. 2015;521:436.
- 476 13. Goodfellow I, Bengio Y, Courville A, Bengio Y. *Deep Learning*. Vol 1. MIT press  
477 Cambridge; 2016.



- 478 14. Bengio Y. Learning Deep Architectures for AI. *MAL*. 2009;2(1):1-127.  
479 doi:10.1561/22000000006
- 480 15. Deng L, Yu D. Deep Learning: Methods and Applications. *SIG*. 2014;7(3–4):197-387.  
481 doi:10.1561/20000000039
- 482 16. Voulodimos A, Doulamis N, Doulamis A, Protopapadakis E. Deep Learning for Computer  
483 Vision: A Brief Review. *Comput Intell Neurosci*. 2018;2018:7068349.  
484 doi:10.1155/2018/7068349
- 485 17. Young T, Hazarika D, Poria S, Cambria E. Recent Trends in Deep Learning Based Natural  
486 Language Processing [Review Article]. *IEEE Computational Intelligence Magazine*.  
487 2018;13(3):55-75. doi:10.1109/MCI.2018.2840738
- 488 18. Shickel B, Tighe P, Bihorac A, Rashidi P. *Deep EHR: A Survey of Recent Advances on  
489 Deep Learning Techniques for Electronic Health Record (EHR) Analysis*. Vol PP.; 2017.  
490 doi:10.1109/JBHI.2017.2767063
- 491 19. Rajkomar A, Oren E, Chen K, et al. Scalable and accurate deep learning with electronic  
492 health records. *npj Digital Medicine*. 2018;1(1):18.
- 493 20. Barrett M, Wier L, Jiang H, Steiner C. All-cause readmissions by payer and age, 2009–  
494 2013: statistical brief# 199. 2006.
- 495 21. Healthcare Cost and Utilization Project (HCUP). NRD overview. 2015.
- 496 22. NRD Database Documentation. [https://www.hcup-](https://www.hcup-us.ahrq.gov/db/nation/nrd/nrddbdocumentation.jsp)  
497 [us.ahrq.gov/db/nation/nrd/nrddbdocumentation.jsp](https://www.hcup-us.ahrq.gov/db/nation/nrd/nrddbdocumentation.jsp). Accessed January 7, 2019.
- 498 23. 2016 Condition-Specific Measures Updates and Specifications Report Hospital-Level 30-  
499 Day Risk-Standardized Readmission Measures: Acute Myocardial Infarction – Version 9.0,  
500 Chronic Obstructive Pulmonary Disease – Version 5.0, Heart Failure – Version 9.0,  
501 Pneumonia – Version 9.0, Stroke – Version 5.0. 2016:112.
- 502 24. Chen T, Guestrin C. XGBoost: A Scalable Tree Boosting System. In: *Proceedings of the  
503 22nd ACM SIGKDD International Conference on Knowledge Discovery and Data Mining -  
504 KDD '16*. San Francisco, California, USA: ACM Press; 2016:785-794.  
505 doi:10.1145/2939672.2939785
- 506 25. Elixhauser A, Steiner C, Harris DR, Coffey RM. Comorbidity measures for use with  
507 administrative data. *Medical care*. 1998;8-27.
- 508 26. *Scalable, Portable and Distributed Gradient Boosting (GBDT, GBRT or GBM) Library, for  
509 Python, R, Java, Scala, C++ and More. Runs on Single Machine, Hadoop, Spark, Flink  
510 and DataFlow: Dmlc/Xgboost*. Distributed (Deep) Machine Learning Community; 2019.  
511 <https://github.com/dmlc/xgboost>. Accessed May 22, 2019.
- 512 27. Pennington J, Socher R, Manning CD. GloVe: Global Vectors for Word Representation. In:  
513 *Empirical Methods in Natural Language Processing (EMNLP)*. ; 2014:1532–1543.  
514 <http://www.aclweb.org/anthology/D14-1162>.

- 515 28. Choi Y, Chiu CY-I, Sontag D. Learning Low-Dimensional Representations of Medical  
516 Concepts. *AMIA Jt Summits Transl Sci Proc.* 2016;2016:41-50.
- 517 29. Finlayson SG, LePendu P, Shah NH. Building the graph of medicine from millions of  
518 clinical narratives. *Scientific Data.* 2014;1:140032. doi:10.1038/sdata.2014.32
- 519 30. Zaheer M, Kottur S, Ravanbakhsh S, Poczos B, Salakhutdinov RR, Smola AJ. Deep Sets.  
520 In: Guyon I, Luxburg UV, Bengio S, et al., eds. *Advances in Neural Information Processing*  
521 *Systems 30.* Curran Associates, Inc.; 2017:3391–3401. [http://papers.nips.cc/paper/6931-](http://papers.nips.cc/paper/6931-deep-sets.pdf)  
522 [deep-sets.pdf](http://papers.nips.cc/paper/6931-deep-sets.pdf).
- 523 31. Lee J. Covariance adjustment of rates based on the multiple logistic regression model.  
524 *Journal of Clinical Epidemiology.* 1981;34(8):415-426.
- 525 32. Lane PW, Nelder JA. Analysis of covariance and standardization as instances of  
526 prediction. *Biometrics.* 1982:613-621.
- 527 33. Chang I-M, Gelman R, Pagano M. Corrected group prognostic curves and summary  
528 statistics. *Journal of chronic diseases.* 1982;35(8):669-674.
- 529 34. Pope GC, Kautter J, Ellis RP, et al. Risk adjustment of Medicare capitation payments using  
530 the CMS-HCC model. *Health Care Financ Rev.* 2004;25(4):119-141.
- 531 35. Choi E, Bahadori MT, Song L, Stewart WF, Sun J. GRAM: graph-based attention model for  
532 healthcare representation learning. In: ACM; 2017:787-795.
- 533 36. Krompass D, Esteban C, Tresp V, Sedlmayr M, Ganslandt T. *Exploiting Latent*  
534 *Embeddings of Nominal Clinical Data for Predicting Hospital Readmission.* Vol 29.; 2014.  
535 doi:10.1007/s13218-014-0344-x
- 536 37. Beam AL, Kompa B, Fried I, et al. Clinical Concept Embeddings Learned from Massive  
537 Sources of Multimodal Medical Data. April 2018. <https://arxiv.org/abs/1804.01486v2>.  
538 Accessed February 22, 2019.
- 539 38. Lebre R, Collobert R. Word emdeddings through hellinger PCA. *arXiv preprint*  
540 *arXiv:13125542.* 2013.
- 541

**Tables**

Table 1. Summary statistics of the predictors for each of the 3 cohorts assessed in this study population.

|                                    | <b>Acute Myocardial Infarction</b> |             | <b>Heart Failure</b> |             | <b>Pneumonia</b> |             |
|------------------------------------|------------------------------------|-------------|----------------------|-------------|------------------|-------------|
|                                    | No Readmission                     | Readmission | No Readmission       | Readmission | No Readmission   | Readmission |
|                                    | N = 177,892                        | N = 24,146  | N = 249,584          | N = 53,649  | N = 257,135      | N = 46,508  |
| Age, mean (std)                    | 66.3 (13.7)                        | 70.5 (13.3) | 72.5 (14.3)          | 72.5 (13.9) | 68.6 (17.2)      | 70.3 (15.8) |
| Female pct.                        | 36.60%                             | 45.00%      | 48.80%               | 49.30%      | 52.60%           | 50.20%      |
| No. of diagnosis codes, mean (std) | 12.4 (6.1)                         | 15.7 (6.4)  | 15.1 (5.5)           | 16.2 (5.7)  | 12.7 (5.8)       | 14.7 (5.8)  |
| No. of procedure codes, mean (std) | 5.6 (3.3)                          | 5.2 (3.9)   | 1.1 (1.9)            | 1.3 (2.1)   | 0.7 (1.5)        | 1.0 (1.8)   |

Table 2. Results of prediction of 30-day readmission for acute myocardial infarction, heart failure and pneumonia as assessed by the Area under the curve of Receiver Operating Characteristic (AUC, with 95% confidence intervals in parentheses) given by the four models: the hierarchical logistic regression, XGBoost, feed-forward artificial neural network (ANN), and medical code embedding deep set architecture models.

| <b>Methods</b>                                  | <b>Acute Myocardial Infarction</b> | <b>Heart Failure</b> | <b>Pneumonia</b>     |
|-------------------------------------------------|------------------------------------|----------------------|----------------------|
| Hierarchical Logistic Regression                | 0.681 (0.678, 0.683)               | 0.595 (0.592, 0.597) | 0.628 (0.624, 0.632) |
| XGBoost                                         | 0.702 (0.698, 0.705)               | 0.614 (0.611, 0.617) | 0.654 (0.651, 0.656) |
| Feed-Forward ANN                                | 0.707 (0.705, 0.709)               | 0.623 (0.620, 0.626) | 0.663 (0.660, 0.666) |
| Medical Code Embedding Deep Set<br>Architecture | 0.720 (0.718, 0.722)               | 0.637 (0.635, 0.639) | 0.680 (0.678, 0.683) |

Table 3. Cross tabulation of divided groups between the hierarchical logistic regression (HLR) and the medical code embedding Deep Set architecture (ME-DS) model for each cohort.

|                            | Acute Myocardial Infarction |            |            |      | Heart Failure |            |            |      | Pneumonia |            |            |      |
|----------------------------|-----------------------------|------------|------------|------|---------------|------------|------------|------|-----------|------------|------------|------|
|                            | <i>Rank in HLR model</i>    |            |            |      |               |            |            |      |           |            |            |      |
| <i>Rank in ME-DS model</i> | Top 20%                     | Middle 60% | Bottom 20% | All  | Top 20%       | Middle 60% | Bottom 20% | All  | Top 20%   | Middle 60% | Bottom 20% | All  |
| Top 20%                    | 151                         | 72         | 0          | 223  | 235           | 106        | 0          | 341  | 261       | 122        | 0          | 383  |
| Middle 60%                 | 72                          | 563        | 37         | 672  | 106           | 854        | 66         | 1026 | 122       | 949        | 82         | 1153 |
| Bottom 20%                 | 0                           | 37         | 186        | 223  | 0             | 66         | 275        | 341  | 0         | 82         | 301        | 383  |
| All                        | 223                         | 672        | 223        | 1118 | 341           | 1026       | 341        | 1708 | 383       | 1153       | 383        | 1919 |

### Figure Titles and Captions

Figure 1. Distribution of risk-standardized hospital readmission rates for acute myocardial infarction (AMI), congestive health failure (HF), and pneumonia (PNA), generated by hierarchical logistic regression (HLR) model and the medical code embedding Deep Set architecture ANN (ME-DS) model.

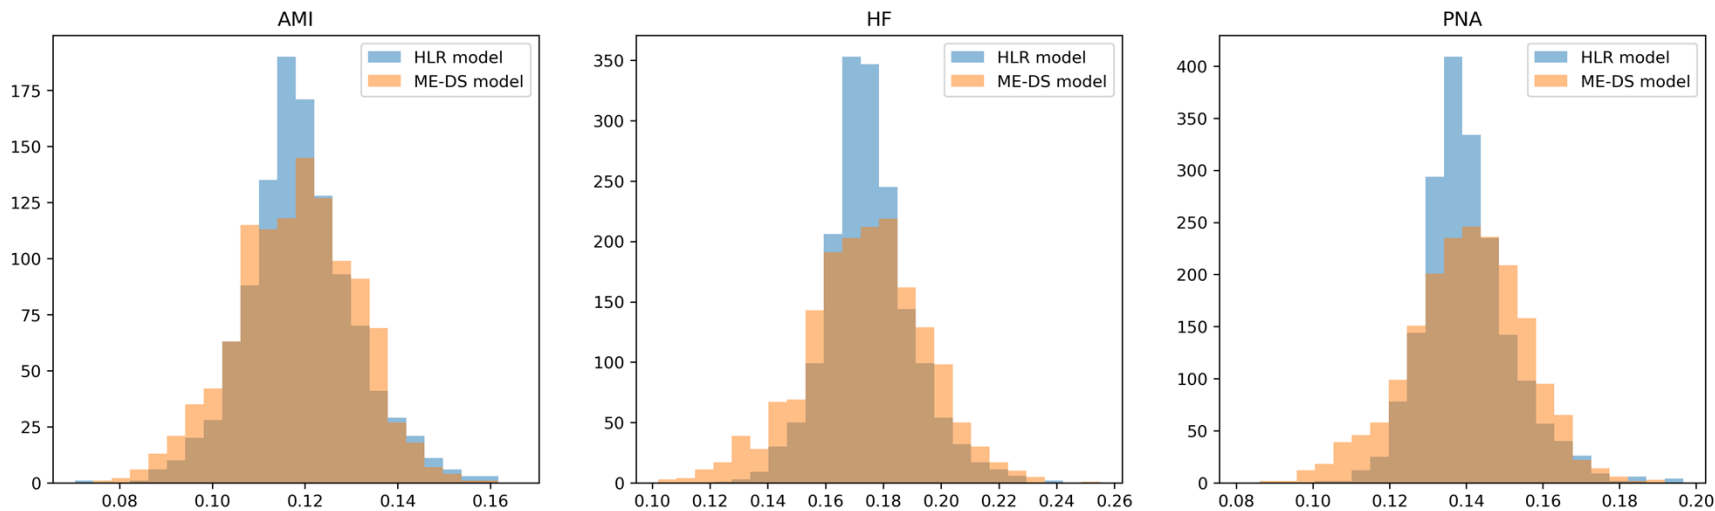

Source: http://biorxiv.org/content/10.1101/741504v1.full.pdf
